# Supplementary material for: Age at menopause and all-cause and cause-specific dementia: a prospective analysis of the UK Biobank cohort
Source: PubMed Central journal article supplement (PMC10663050; doi:10.1093/humrep/dead130), 2023-06-21
Supplement: dead130_supplementary_figure_s2.pdf [file dead130_supplementary_figure_s2.pdf]

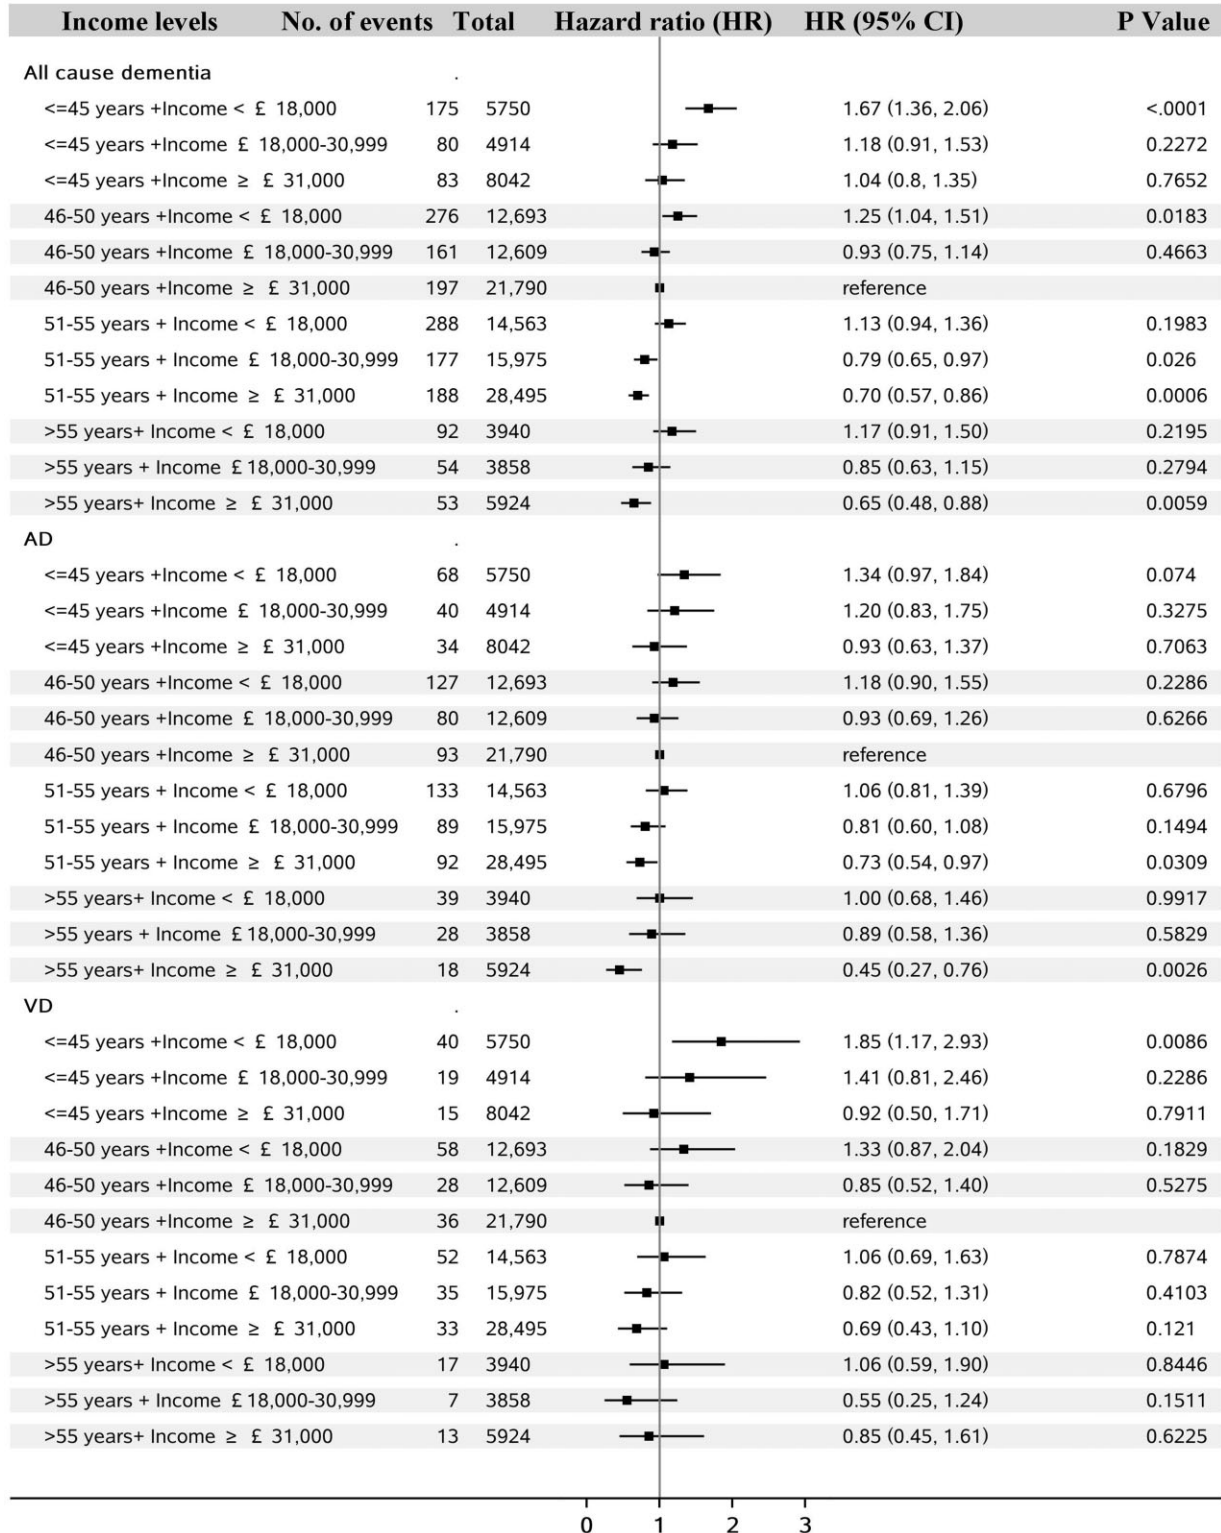

Supplementary Figure S2. Combined effect of age at menopause and income level on risk of incident all-cause dementia, Alzheimer's dementia (AD) and vascular dementia (VD).
