# Supplementary material for: Age at menopause and all-cause and cause-specific dementia: a prospective analysis of the UK Biobank cohort
Source: PubMed Central journal article supplement (PMC10663050; doi:10.1093/humrep/dead130), 2023-06-21
Supplement: dead130_supplementary_table_s1.pdf [file dead130_supplementary_table_s1.pdf]

**Supplementary Table S1.** Exposures, outcomes, and covariates' definitions and descriptions.

| Variables                        | Categorizations                                                                                                                         | UK Biobank code                                                                    | Descriptions                                                                                                                                                                                                                                                                                                                                                                                                                       |
|----------------------------------|-----------------------------------------------------------------------------------------------------------------------------------------|------------------------------------------------------------------------------------|------------------------------------------------------------------------------------------------------------------------------------------------------------------------------------------------------------------------------------------------------------------------------------------------------------------------------------------------------------------------------------------------------------------------------------|
| <b>Age at natural menopause</b>  | ≤40 years,<br>41–45 years,<br>46–50 years,<br>51–55 years,<br>≥55 years                                                                 | 3581, 2724                                                                         | Touchscreen question<br>(i) 'How old were you when your periods stopped?'<br>(ii) 'Have you had your menopause (periods stopped)?'                                                                                                                                                                                                                                                                                                 |
| <b>Age at surgical menopause</b> | ≤40 years,<br>41–45 years,<br>46–50 years,<br>51–55 years,<br>≥55 years                                                                 | 3882                                                                               | Touchscreen question 'How old were you when you had BOTH ovaries removed?'                                                                                                                                                                                                                                                                                                                                                         |
| <b>All cause dementia</b>        | No,<br>Yes                                                                                                                              | ICD-10 codes: F00, F01, F02,<br>F03, G30, G310, G311,<br>G318;<br>ICD-9 codes: 290 | ICD-10 codes:<br>F00 Dementia in Alzheimer's disease<br>F01 Vascular dementia<br>F02 Dementia in other diseases classified elsewhere<br>F03 Unspecified dementia<br>G30 Alzheimer's disease<br>G310 Circumscribed brain atrophy<br>G311 Senile degeneration of brain, not elsewhere classified<br>G318 Other specified degenerative disease of nervous system<br>ICD-9 code 290: Senile and presenile organic psychotic conditions |
| <b>Alzheimer</b>                 | No,<br>Yes                                                                                                                              | ICD-10 codes: F00, G30;<br>ICD-9 codes: 290.1                                      | ICD-10 codes:<br>F00 Dementia in Alzheimer's disease<br>G30 Alzheimer's disease<br>ICD-9 code 290: Senile and presenile organic psychotic conditions                                                                                                                                                                                                                                                                               |
| <b>Vascular dementia</b>         | No,<br>Yes                                                                                                                              | ICD-10 codes: F01                                                                  | ICD-10 codes:<br>F01 Vascular dementia                                                                                                                                                                                                                                                                                                                                                                                             |
| <b>Age (years)</b>               | Age at baseline                                                                                                                         | 21022                                                                              | Date attended baseline assessment minus date of birth                                                                                                                                                                                                                                                                                                                                                                              |
| <b>Ethnicity</b>                 | White, Asian or Asian British,<br>Black or Black British, Other                                                                         | 21000                                                                              | Touchscreen questionnaire: 'What is your ethnic group?'                                                                                                                                                                                                                                                                                                                                                                            |
| <b>Education levels</b>          | Years of education ≤10,<br>11–12,<br>>12                                                                                                | 6138, 845                                                                          | Touchscreen questionnaire:<br>(i) 'Which of the following qualifications do you have?'<br>(ii) 'At what age did you complete your continuous full-time education?'                                                                                                                                                                                                                                                                 |
| <b>Income levels</b>             | Level <sub>1</sub> : Less than £18 000<br>Level <sub>2</sub> : £18 000–30 999<br>Level <sub>3</sub> : greater than £31 000              | 738                                                                                | Touchscreen questionnaire: 'what is the average total income before tax received by your HOUSEHOLD?'                                                                                                                                                                                                                                                                                                                               |
| <b>BMI (kg/m<sup>2</sup>)</b>    | Underweight < 18.5,<br>Normal (18.5, 24.9),<br>Overweight (25.0, 29.9),<br>Obese ≥ 30.0                                                 | 21001                                                                              | Physical examination: BMI                                                                                                                                                                                                                                                                                                                                                                                                          |
| <b>Smoking status</b>            | Never,<br>Former,<br>Current                                                                                                            | 20116                                                                              | Touchscreen questionnaire: 'How often do you smoke tobacco?'                                                                                                                                                                                                                                                                                                                                                                       |
| <b>Alcohol intake</b>            | Daily or almost daily,<br>3–4 times a week,<br>1–2 times a week,<br>Occasionally,<br>Never                                              | 1558                                                                               | Touchscreen questionnaire: 'About how often do you drink alcohol?'                                                                                                                                                                                                                                                                                                                                                                 |
| <b>Leisure/social activities</b> | Sports club or gym,<br>Pub or social club,<br>Religious group,<br>Adult education class,<br>Other group activity,<br>None of the above, | 6160                                                                               | Touchscreen question 'Which of the following do you attend once a week or more often? (You can select more than one)'                                                                                                                                                                                                                                                                                                              |

(continued)

Supplementary Table S1. Continued

| Variables                               | Categorizations                                                                                                                         | UK Biobank code                                                                    | Descriptions                                                                                                                                                                                                                                                                                                                                                                                                                       |
|-----------------------------------------|-----------------------------------------------------------------------------------------------------------------------------------------|------------------------------------------------------------------------------------|------------------------------------------------------------------------------------------------------------------------------------------------------------------------------------------------------------------------------------------------------------------------------------------------------------------------------------------------------------------------------------------------------------------------------------|
| <b>Physical activities</b>              | Low,<br>Moderate,<br>High                                                                                                               | 22032                                                                              | UK Biobank used International Physical Activity Questionnaire (IPAQ) to calculate metabolic equivalent (MET) score. For those who were missing with MET score, we used their number of days/week of moderate physical activity to categorize their physical activity level.                                                                                                                                                        |
| <b>Cardiovascular disease (CVD)</b>     | No,<br>Yes                                                                                                                              | 6150                                                                               | Touchscreen questionnaire and verbal interview: 'Do you regularly take any of the following medications?'                                                                                                                                                                                                                                                                                                                          |
| <b>APOE e4 carrier status</b>           | No APOE e4,<br>One APOE e4,<br>Two APOE e4                                                                                              | rs7412, rs429358                                                                   | Number of APOE e4: none (e2/e2, e2/e3, or e3/e3 haplotypes), one (e3/e4 and occasionally e2/e4 haplotypes), and two (e4/e4 haplotypes)                                                                                                                                                                                                                                                                                             |
| <b>Menopausal hormone therapy (MHT)</b> | Yes,<br>No                                                                                                                              | 2814                                                                               | Touchscreen question 'Have you ever used hormone replacement therapy (HRT)?'                                                                                                                                                                                                                                                                                                                                                       |
| <b>Age at natural menopause</b>         | ≤40 years,<br>41–45 years,<br>46–50 years,<br>51–55 years,<br>≥55 years                                                                 | 3581, 2724                                                                         | Touchscreen question<br>(i) 'How old were you when your periods stopped?'<br>(ii) 'Have you had your menopause (periods stopped)?'                                                                                                                                                                                                                                                                                                 |
| <b>Age at surgical menopause</b>        | ≤40 years,<br>41–45 years,<br>46–50 years,<br>51–55 years,<br>≥55 years                                                                 | 3882                                                                               | Touchscreen question 'How old were you when you had BOTH ovaries removed?'                                                                                                                                                                                                                                                                                                                                                         |
| <b>All cause dementia</b>               | No,<br>Yes                                                                                                                              | ICD-10 codes: F00, F01, F02,<br>F03, G30, G310, G311,<br>G318;<br>ICD-9 codes: 290 | ICD-10 codes:<br>F00 Dementia in Alzheimer's disease<br>F01 Vascular dementia<br>F02 Dementia in other diseases classified elsewhere<br>F03 Unspecified dementia<br>G30 Alzheimer's disease<br>G310 Circumscribed brain atrophy<br>G311 Senile degeneration of brain, not elsewhere classified<br>G318 Other specified degenerative disease of nervous system<br>ICD-9 code 290: Senile and presenile organic psychotic conditions |
| <b>Alzheimer</b>                        | No,<br>Yes                                                                                                                              | ICD-10 codes: F00, G30;<br>ICD-9 codes: 290.1                                      | ICD-10 codes:<br>F00 Dementia in Alzheimer's disease<br>G30 Alzheimer's disease<br>ICD-9 code 290: Senile and presenile organic psychotic conditions                                                                                                                                                                                                                                                                               |
| <b>Vascular dementia</b>                | No,<br>Yes                                                                                                                              | ICD-10 codes: F01                                                                  | ICD-10 codes:<br>F01 Vascular dementia                                                                                                                                                                                                                                                                                                                                                                                             |
| <b>Age (years)</b>                      | Age at baseline                                                                                                                         | 21022                                                                              | Date attended baseline assessment minus date of birth                                                                                                                                                                                                                                                                                                                                                                              |
| <b>Ethnicity</b>                        | White, Asian or Asian British,<br>Black or Black British, Other                                                                         | 21000                                                                              | Touchscreen questionnaire: 'What is your ethnic group?'                                                                                                                                                                                                                                                                                                                                                                            |
| <b>Education levels</b>                 | Years of education ≤10,<br>11–12,<br>>12                                                                                                | 6138, 845                                                                          | Touchscreen questionnaire:<br>(i) 'Which of the following qualifications do you have?'<br>(ii) 'At what age did you complete your continuous full-time education?'                                                                                                                                                                                                                                                                 |
| <b>Income levels</b>                    | Level <sub>1</sub> : Less than £18 000<br>Level <sub>2</sub> : £18 000–30 999<br>Level <sub>3</sub> : greater than £31 000              | 738                                                                                | Touchscreen questionnaire: 'what is the average total income before tax received by your HOUSEHOLD?'                                                                                                                                                                                                                                                                                                                               |
| <b>BMI (kg/m<sup>2</sup>)</b>           | Underweight < 18.5,<br>Normal (18.5, 24.9),<br>Overweight (25.0, 29.9),<br>Obese ≥ 30.0                                                 | 21001                                                                              | Physical examination: BMI                                                                                                                                                                                                                                                                                                                                                                                                          |
| <b>Smoking status</b>                   | Never,<br>Former,<br>Current                                                                                                            | 20116                                                                              | Touchscreen questionnaire: 'How often do you smoke tobacco?'                                                                                                                                                                                                                                                                                                                                                                       |
| <b>Alcohol intake</b>                   | Daily or almost daily,<br>3–4 times a week,<br>1–2 times a week,<br>Occasionally,<br>Never                                              | 1558                                                                               | Touchscreen questionnaire: 'About how often do you drink alcohol?'                                                                                                                                                                                                                                                                                                                                                                 |
| <b>Leisure/social activities</b>        | Sports club or gym,<br>Pub or social club,<br>Religious group,<br>Adult education class,<br>Other group activity,<br>None of the above, | 6160                                                                               | Touchscreen question 'Which of the following do you attend once a week or more often? (You can select more than one)'                                                                                                                                                                                                                                                                                                              |

(continued)

Supplementary Table S1. Continued

| Variables                               | Categorizations                            | UK Biobank code  | Descriptions                                                                                                                                                                                                                                                                |
|-----------------------------------------|--------------------------------------------|------------------|-----------------------------------------------------------------------------------------------------------------------------------------------------------------------------------------------------------------------------------------------------------------------------|
| <b>Physical activities</b>              | Low,<br>Moderate,<br>High                  | 22032            | UK Biobank used International Physical Activity Questionnaire (IPAQ) to calculate metabolic equivalent (MET) score. For those who were missing with MET score, we used their number of days/week of moderate physical activity to categorize their physical activity level. |
| <b>Cardiovascular disease (CVD)</b>     | No,<br>Yes                                 | 6150             | Touchscreen questionnaire and verbal interview: 'Do you regularly take any of the following medications?'                                                                                                                                                                   |
| <b>APOE e4 carrier status</b>           | No APOE e4,<br>One APOE e4,<br>Two APOE e4 | rs7412, rs429358 | Number of APOE e4: none (e2/e2, e2/e3, or e3/e3 haplotypes), one (e3/e4 and occasionally e2/e4 haplotypes), and two (e4/e4 haplotypes)                                                                                                                                      |
| <b>Menopausal hormone therapy (MHT)</b> | Yes,<br>No                                 | 2814             | Touchscreen question 'Have you ever used hormone replacement therapy (HRT)?'                                                                                                                                                                                                |
