# Supplementary material for: Age at menopause and all-cause and cause-specific dementia: a prospective analysis of the UK Biobank cohort
Source: PubMed Central journal article supplement (PMC10663050; doi:10.1093/humrep/dead130), 2023-06-21
Supplement: dead130_supplementary_table_s2.pdf [file dead130_supplementary_table_s2.pdf]

**Supplementary Table S2.** Characteristics by age at surgical menopause and incident all-cause dementia events.

| Characteristics             | Age at surgical menopause |                           |                           |                           |                         | Incident dementia  |                  |
|-----------------------------|---------------------------|---------------------------|---------------------------|---------------------------|-------------------------|--------------------|------------------|
|                             | ≤40 years<br>(n = 2862)   | 41–45 years<br>(n = 4945) | 46–50 years<br>(n = 6238) | 51–55 years<br>(n = 3754) | ≥55 years<br>(n = 3728) | No<br>(n = 21 167) | Yes<br>(n = 360) |
| Age at baseline             | 56.3 ± 7.9                | 57.1 ± 6.9                | 59.3 ± 6.0                | 60.7 ± 5.3                | 63.4 ± 4.2              | 59.3 ± 6.6         | 64.1 ± 5.0       |
| Ethnicity                   |                           |                           |                           |                           |                         |                    |                  |
| White                       | 2715 (94.9)               | 4679 (94.6)               | 5964 (95.6)               | 3615 (96.3)               | 3607 (96.8)             | 20 241 (95.6)      | 339 (94.2)       |
| Nonwhite                    | 147 (5.1)                 | 266 (5.4)                 | 274 (4.4)                 | 139 (3.7)                 | 121 (3.2)               | 926 (4.4)          | 21 (5.8)         |
| Education level             |                           |                           |                           |                           |                         |                    |                  |
| ≤10                         | 1783 (62.3)               | 2938 (59.4)               | 3584 (57.5)               | 1968 (52.4)               | 2145 (57.5)             | 12 176 (57.5)      | 242 (67.2)       |
| 11–12                       | 333 (11.6)                | 552 (11.2)                | 675 (10.8)                | 455 (12.1)                | 360 (9.7)               | 2338 (11.2)        | 37 (10.3)        |
| >12                         | 746 (26.1)                | 1455 (29.4)               | 1979 (31.7)               | 1331 (35.5)               | 1223 (32.8)             | 6653 (31.3)        | 81 (22.5)        |
| Income (£)                  |                           |                           |                           |                           |                         |                    |                  |
| <18 000                     | 879 (30.7)                | 1426 (28.8)               | 1809 (29.0)               | 1082 (28.8)               | 1251 (33.6)             | 6299 (29.8)        | 148 (41.1)       |
| 18 000–30 999               | 708 (24.7)                | 1255 (25.4)               | 1764 (28.3)               | 1051 (28.0)               | 1089 (29.2)             | 5767 (27.2)        | 100 (27.8)       |
| ≥31 000                     | 1275 (44.6)               | 2264 (45.8)               | 2665 (42.7)               | 1621 (43.2)               | 1388 (37.2)             | 9101 (43.0)        | 112 (31.1)       |
| BMI                         |                           |                           |                           |                           |                         |                    |                  |
| <18.5 kg/m <sup>2</sup>     | 18 (0.6)                  | 15 (0.3)                  | 37 (0.6)                  | 13 (0.4)                  | 24 (0.6)                | 103 (0.5)          | 4 (1.1)          |
| 18.5–24.9 kg/m <sup>2</sup> | 785 (27.4)                | 1440 (29.2)               | 2006 (32.2)               | 1282 (34.2)               | 1204 (32.3)             | 6615 (31.2)        | 102 (28.3)       |
| 25.0–29.9 kg/m <sup>2</sup> | 1075 (37.6)               | 1945 (39.3)               | 2396 (38.4)               | 1440 (38.4)               | 1437 (38.6)             | 8140 (38.5)        | 153 (42.5)       |
| ≥30 kg/m <sup>2</sup>       | 984 (34.4)                | 1545 (31.2)               | 1799 (28.8)               | 1019 (27.0)               | 1063 (28.5)             | 6309 (29.8)        | 101 (28.1)       |
| Cigarette smoking           |                           |                           |                           |                           |                         |                    |                  |
| Never smoker                | 1481 (51.8)               | 2794 (56.5)               | 3634 (58.3)               | 2302 (61.3)               | 2148 (57.6)             | 12 166 (57.5)      | 193 (53.6)       |
| Former smoker               | 928 (32.4)                | 1612 (32.6)               | 2132 (34.2)               | 1233 (32.8)               | 1352 (36.3)             | 7132 (33.7)        | 125 (34.7)       |
| Current smoker              | 453 (15.8)                | 539 (10.9)                | 472 (7.5)                 | 219 (5.9)                 | 228 (6.1)               | 1869 (8.8)         | 42 (11.7)        |
| Alcohol drinking            |                           |                           |                           |                           |                         |                    |                  |
| Never drinker               | 248 (8.7)                 | 328 (6.6)                 | 368 (5.9)                 | 218 (5.8)                 | 264 (7.1)               | 1391 (6.6)         | 35 (9.7)         |
| Former drinker              | 196 (6.7)                 | 256 (5.2)                 | 271 (4.3)                 | 118 (3.1)                 | 156 (4.2)               | 970 (4.6)          | 27 (7.5)         |
| Current drinker             | 2418 (84.6)               | 4361 (88.2)               | 5599 (89.8)               | 3418 (91.1)               | 3308 (88.7)             | 18 806 (88.8)      | 298 (82.8)       |
| No. of leisure activities   |                           |                           |                           |                           |                         |                    |                  |
| 0                           | 1028 (35.9)               | 1583 (32.0)               | 1808 (29.0)               | 1057 (28.2)               | 991 (26.6)              | 6339 (30.0)        | 128 (35.6)       |
| 1                           | 1144 (40.0)               | 2055 (41.6)               | 2627 (42.1)               | 1516 (40.4)               | 1547 (41.5)             | 8732 (41.3)        | 157 (43.6)       |
| ≥2                          | 690 (24.1)                | 1307 (26.4)               | 1803 (28.9)               | 1181 (31.5)               | 1190 (31.9)             | 6096 (28.7)        | 75 (20.8)        |
| CVD                         |                           |                           |                           |                           |                         |                    |                  |
| No                          | 2555 (89.3)               | 4575 (92.5)               | 5802 (93.0)               | 3499 (93.2)               | 3380 (90.7)             | 19 533 (92.3)      | 278 (77.2)       |
| Yes                         | 307 (10.7)                | 370 (7.5)                 | 436 (7.0)                 | 255 (6.8)                 | 348 (9.3)               | 1634 (7.7)         | 82 (22.8)        |
| APOE e4                     |                           |                           |                           |                           |                         |                    |                  |
| No APOE e4                  | 2175 (76.0)               | 3717 (75.2)               | 4697 (75.3)               | 2775 (73.9)               | 2892 (77.6)             | 16 081 (76.0)      | 175 (48.6)       |
| One APOE e4                 | 615 (21.5)                | 1120 (22.7)               | 1412 (22.6)               | 899 (24.0)                | 772 (20.7)              | 4667 (22.1)        | 151 (42.0)       |
| Two APOE e4                 | 72 (2.5)                  | 108 (2.1)                 | 129 (2.1)                 | 80 (2.1)                  | 64 (1.7)                | 419 (1.9)          | 34 (9.4)         |
| Ever-used MHT at baseline   |                           |                           |                           |                           |                         |                    |                  |
| No                          | 391 (13.7)                | 575 (11.6)                | 939 (15.1)                | 1016 (27.1)               | 1367 (36.7)             | 4192 (19.8)        | 96 (26.7)        |
| Yes                         | 2471 (86.3)               | 4370 (88.4)               | 5299 (84.9)               | 2738 (72.9)               | 2361 (63.3)             | 16 975 (80.2)      | 264 (73.3)       |

CVD, cardiovascular disease; APOE, apolipoprotein E; MHT, menopausal hormone therapy.
