# Supplementary material for: Age at menopause and all-cause and cause-specific dementia: a prospective analysis of the UK Biobank cohort
Source: PubMed Central journal article supplement (PMC10663050; doi:10.1093/humrep/dead130), 2023-06-21
Supplement: dead130_supplementary_table_s3.pdf [file dead130_supplementary_table_s3.pdf]

**Supplementary Table S3.** Baseline characteristics between women with and without (were excluded) information on age at menopause (%).

| Characteristics             | With information on age at menopause<br>(n = 138 533) | Without information on age at menopause<br>(n = 19 384) |
|-----------------------------|-------------------------------------------------------|---------------------------------------------------------|
| Age at baseline (mean ± SD) | 59.2 ± 6.1                                            | 61.7 ± 5.5                                              |
| Ethnicity                   |                                                       |                                                         |
| White                       | 132 905 (95.9)                                        | 18 512 (95.5)                                           |
| Nonwhite                    | 5 648 (4.1)                                           | 872 (4.5)                                               |
| Education level             |                                                       |                                                         |
| ≤10                         | 69 130 (49.9)                                         | 11 274 (58.2)                                           |
| 11–12                       | 16 604 (12.0)                                         | 2 090 (10.8)                                            |
| >12                         | 52 819 (38.1)                                         | 6 020 (31.1)                                            |
| Income (£)                  |                                                       |                                                         |
| <18 000                     | 36 946 (26.7)                                         | 6 524 (33.6)                                            |
| 18 000–30 999               | 37 356 (27.0)                                         | 5 349 (27.6)                                            |
| ≥31 000                     | 64 251 (46.3)                                         | 7 511 (38.8)                                            |
| BMI                         |                                                       |                                                         |
| <18.5 kg/m <sup>2</sup>     | 1 092 (0.8)                                           | 132 (0.7)                                               |
| 18.5–24.9 kg/m <sup>2</sup> | 54 955 (39.7)                                         | 6 739 (34.8)                                            |
| 25.0–29.9 kg/m <sup>2</sup> | 52 060 (37.6)                                         | 7 661 (39.5)                                            |
| ≥30 kg/m <sup>2</sup>       | 30 446 (21.9)                                         | 4 852 (25.0)                                            |
| Cigarette smoking           |                                                       |                                                         |
| Never smoker                | 81 272 (58.7)                                         | 11 066 (57.1)                                           |
| Former smoker               | 46 170 (33.3)                                         | 6 856 (35.4)                                            |
| Current smoker              | 11 111 (8.0)                                          | 1 462 (7.5)                                             |
| Alcohol drinking            |                                                       |                                                         |
| Never drinker               | 7 559 (5.5)                                           | 1 318 (6.8)                                             |
| Former drinker              | 4 840 (3.5)                                           | 839 (4.3)                                               |
| Current drinker             | 126 154 (91.0)                                        | 17 227 (88.9)                                           |
| No. of leisure activities   |                                                       |                                                         |
| 0                           | 36 331 (26.2)                                         | 5 470 (28.2)                                            |
| 1                           | 57 897 (41.8)                                         | 8 162 (42.1)                                            |
| ≥2                          | 44 325 (32.0)                                         | 5 752 (29.7)                                            |
| CVD                         |                                                       |                                                         |
| No                          | 131 086 (94.6)                                        | 17 687 (91.2)                                           |
| Yes                         | 7 467 (5.4)                                           | 1 697 (8.8)                                             |
| APOE e4                     |                                                       |                                                         |
| No APOE e4,                 | 105 127 (75.9)                                        | 14 609 (75.4)                                           |
| One APOE e4,                | 30 661 (22.1)                                         | 4 379 (22.6)                                            |
| Two APOE e4                 | 2 765 (2.0)                                           | 396 (2.0)                                               |
| MHT                         |                                                       |                                                         |
| No                          | 80 844 (58.4)                                         | 6 725 (34.7)                                            |
| Yes                         | 57 709 (41.6)                                         | 12 659 (65.3)                                           |
