# Supplementary material for: Age at menopause and all-cause and cause-specific dementia: a prospective analysis of the UK Biobank cohort
Source: PubMed Central journal article supplement (PMC10663050; doi:10.1093/humrep/dead130), 2023-06-21
Supplement: dead130_supplementary_table_s4.pdf [file dead130_supplementary_table_s4.pdf]

**Supplementary Table S4.** Comparison dementia status and age at menopause between women who were excluded for missing covariates and who were included in the analytical sample (%).

|                                 | Without missing covariates (n = 138 553) | Missing covariates (n = 7525) |
|---------------------------------|------------------------------------------|-------------------------------|
| Age at natural menopause (year) | 50.5 ± 4.5                               | 50.0 ± 4.7                    |
| ≤40 years                       | 2427 (1.8)                               | 255 (3.4)                     |
| 41–45 years                     | 16 279 (11.8)                            | 1123 (14.9)                   |
| 46–50 years                     | 47 092 (34.0)                            | 2671 (35.5)                   |
| 51–55 years                     | 59 033 (42.6)                            | 2679 (35.6)                   |
| ≥55 years                       | 13 722 (9.8)                             | 797 (10.6)                    |
| All cause dementia              |                                          |                               |
| No                              | 136 729 (98.7)                           | 7343 (97.8)                   |
| Yes                             | 1824 (1.3)                               | 182 (2.2)                     |
