# Supplementary material for: Age at menopause and all-cause and cause-specific dementia: a prospective analysis of the UK Biobank cohort
Source: PubMed Central journal article supplement (PMC10663050; doi:10.1093/humrep/dead130), 2023-06-21
Supplement: dead130_supplementary_table_s5.pdf [file dead130_supplementary_table_s5.pdf]

**Supplementary Table S5.** Associations between age at natural menopause (including premenopausal) and all-cause dementia, Alzheimer’s disease (AD) and vascular dementia (VD).

| Dementia                 | Years         | Women  | Dementia | Incidence rate (per 10 000 person-years) | Model 1 HR (95% CI) | Model 2 HR (95% CI) | Model 3 HR (95% CI) | Model 4 HR (95% CI) |
|--------------------------|---------------|--------|----------|------------------------------------------|---------------------|---------------------|---------------------|---------------------|
| All-cause dementia       | Premenopausal | 72 234 | 144      | 1.6                                      | 1.14 (0.91, 1.43)   | 1.14 (0.92, 1.43)   | 1.15 (0.92, 1.44)   | 1.16 (0.93, 1.44)   |
|                          | ≤40           | 2390   | 49       | 16.8                                     | 1.59 (1.19, 2.14)   | 1.50 (1.12, 2.01)   | 1.36 (1.01, 1.83)   | 1.35 (1.00, 1.81)   |
|                          | 41–45         | 15 835 | 289      | 15.0                                     | 1.25 (1.08, 1.43)   | 1.23 (1.07, 1.41)   | 1.19 (1.04, 1.37)   | 1.18 (1.03, 1.36)   |
|                          | 46–50         | 44 755 | 633      | 11.5                                     | 1                   | 1                   | 1                   | 1                   |
|                          | 51–55         | 54 587 | 653      | 9.7                                      | 0.80 (0.72, 0.90)   | 0.82 (0.74, 0.92)   | 0.83 (0.75, 0.93)   | 0.83 (0.75, 0.93)   |
| Alzheimer’s disease (AD) | >55           | 12 684 | 199      | 12.9                                     | 0.81 (0.69, 0.96)   | 0.84 (0.71, 0.98)   | 0.84 (0.72, 0.99)   | 0.84 (0.71, 0.99)   |
|                          | Premenopausal | 72 234 | 46       | 0.5                                      | 0.95 (0.66, 1.36)   | 0.95 (0.66, 1.36)   | 0.96 (0.67, 1.37)   | 0.96 (0.67, 1.37)   |
|                          | ≤40           | 2390   | 24       | 8.4                                      | 1.71 (1.13, 2.60)   | 1.63 (1.07, 2.47)   | 1.49 (0.98, 2.27)   | 1.48 (0.98, 2.25)   |
|                          | 41–45         | 15 835 | 118      | 6.1                                      | 1.08 (0.87, 1.34)   | 1.06 (0.86, 1.32)   | 1.04 (0.84, 1.29)   | 1.04 (0.84, 1.29)   |
|                          | 46–50         | 44 755 | 299      | 5.5                                      | 1                   | 1                   | 1                   | 1                   |
| Vascular dementia (VD)   | 51–55         | 54 587 | 314      | 4.7                                      | 0.82 (0.70, 0.96)   | 0.84 (0.71, 0.98)   | 0.85 (0.72, 0.99)   | 0.85 (0.72, 0.99)   |
|                          | >55           | 12 684 | 85       | 5.5                                      | 0.73 (0.58, 0.94)   | 0.75 (0.59, 0.96)   | 0.75 (0.59, 0.96)   | 0.75 (0.59, 0.96)   |
|                          | Premenopausal | 72 234 | 22       | 0.2                                      | 1.35 (0.80, 2.28)   | 1.34 (0.80, 2.26)   | 1.34 (0.80, 2.24)   | 1.34 (0.80, 2.25)   |
|                          | ≤40           | 2390   | 12       | 4.2                                      | 1.99 (1.10, 3.60)   | 1.84 (1.01, 3.33)   | 1.61 (0.89, 2.92)   | 1.59 (0.87, 2.88)   |
|                          | 41–45         | 15 835 | 62       | 3.2                                      | 1.34 (0.98, 1.82)   | 1.31 (0.96, 1.78)   | 1.26 (0.92, 1.71)   | 1.25 (0.91, 1.70)   |
|                          | 46–50         | 44 755 | 122      | 2.2                                      | 1                   | 1                   | 1                   | 1                   |
|                          | 51–55         | 54 587 | 120      | 1.8                                      | 0.77 (0.59, 0.99)   | 0.79 (0.61, 1.02)   | 0.80 (0.62, 1.03)   | 0.80 (0.62, 1.03)   |
| >55                      | 12 684        | 37     | 2.4      | 0.74 (0.51, 1.08)                        | 0.77 (0.53, 1.11)   | 0.78 (0.54, 1.13)   | 0.78 (0.54, 1.12)   |                     |

Model 1: adjusted for age at baseline, race, BMI, education level, income level; Model 2: Model 1 plus leisure activities, cigarette smoking, alcohol drinking; Model 3: Model 2 plus CVD (Cardiovascular disease) and APOE (apolipoprotein E); Model 4: Model 3 plus ever-used menopausal hormone therapy (MHT) at baseline. HR, hazard ratio; CI, confidence interval.
