# Supplementary material for: Age at menopause and all-cause and cause-specific dementia: a prospective analysis of the UK Biobank cohort
Source: PubMed Central journal article supplement (PMC10663050; doi:10.1093/humrep/dead130), 2023-06-21
Supplement: dead130_supplementary_table_s6.pdf [file dead130_supplementary_table_s6.pdf]

**Supplementary Table S6.** The associations between age at natural menopause and dementia with cardiovascular diseases (CVD) being adjusted or not.

| Age at natural menopause | All cause dementia |                   | Alzheimer's Disease |                   | Vascular dementia (VD) |                   |
|--------------------------|--------------------|-------------------|---------------------|-------------------|------------------------|-------------------|
|                          | CVD not adjusted   | CVD adjusted      | CVD not adjusted    | CVD adjusted      | CVD not adjusted       | CVD adjusted      |
| ≤40                      | 1.44 (1.08, 1.94)  | 1.36 (1.01, 1.83) | 1.56 (1.03, 2.36)   | 1.48 (0.98, 2.25) | 1.74 (0.96, 3.16)      | 1.59 (0.88, 2.88) |
| 41–45                    | 1.22 (1.06, 1.40)  | 1.19 (1.03, 1.37) | 1.05 (0.85, 1.31)   | 1.04 (0.84, 1.29) | 1.29 (0.95, 1.76)      | 1.25 (0.92, 1.70) |
| 46–50                    | 1                  | 1                 | 1                   | 1                 | 1                      | 1                 |
| 51–55                    | 0.82 (0.73, 0.91)  | 0.83 (0.74, 0.92) | 0.83 (0.71, 0.98)   | 0.84 (0.72, 0.98) | 0.79 (0.61, 1.01)      | 0.80 (0.62, 1.03) |
| >55                      | 0.83 (0.71, 0.97)  | 0.83 (0.71, 0.98) | 0.74 (0.58, 0.95)   | 0.74 (0.58, 0.95) | 0.77 (0.53, 1.11)      | 0.78 (0.54, 1.12) |

All models were adjusted age at baseline, race, BMI education level, income level, leisure activities, cigarette smoking, alcohol drinking, and APOE (apolipoprotein E), ever-used menopausal hormone therapy (MHT) at baseline.
