# Supplementary material for: Age at menopause and all-cause and cause-specific dementia: a prospective analysis of the UK Biobank cohort
Source: PubMed Central journal article supplement (PMC10663050; doi:10.1093/humrep/dead130), 2023-06-21
Supplement: dead130_supplementary_table_s7.pdf [file dead130_supplementary_table_s7.pdf]

**Supplementary Table S7.** Associations between age at menopause and all-cause dementia, Alzheimer’s disease (AD) and vascular dementia (VD): only included dementia events which occurred at least 5 years after menopause.

| Dementia                 | Age at menopause (years) | Women (n) | Dementia events (n) | Model 1<br>HR (95% CI) | Model 2<br>HR (95% CI) | Model 3<br>HR (95% CI) | Model 4<br>HR (95% CI) |
|--------------------------|--------------------------|-----------|---------------------|------------------------|------------------------|------------------------|------------------------|
| All-cause dementia       | ≤40                      | 2427      | 49                  | 1.60 (1.20, 2.15)      | 1.51 (1.13, 2.03)      | 1.37 (1.02, 1.84)      | 1.36 (1.01, 1.83)      |
|                          | 41–45                    | 16 279    | 289                 | 1.25 (1.09, 1.44)      | 1.23 (1.07, 1.42)      | 1.20 (1.04, 1.38)      | 1.19 (1.03, 1.37)      |
|                          | 46–50                    | 47 087    | 629                 | 1                      | 1                      | 1                      | 1                      |
|                          | 51–55                    | 59 027    | 647                 | 0.79 (0.71, 0.89)      | 0.81 (0.73, 0.91)      | 0.82 (0.74, 0.92)      | 0.82 (0.74, 0.92)      |
|                          | >55                      | 13 722    | 199                 | 0.81 (0.69, 0.95)      | 0.83 (0.71, 0.98)      | 0.84 (0.71, 0.98)      | 0.83 (0.71, 0.98)      |
| Alzheimer’s disease (AD) | ≤40                      | 2427      | 24                  | 1.71 (1.12, 2.59)      | 1.63 (1.07, 2.47)      | 1.49 (0.98, 2.26)      | 1.48 (0.98, 2.25)      |
|                          | 41–45                    | 16 279    | 118                 | 1.08 (0.87, 1.34)      | 1.06 (0.86, 1.32)      | 1.04 (0.84, 1.29)      | 1.04 (0.84, 1.29)      |
|                          | 46–50                    | 47 087    | 299                 | 1                      | 1                      | 1                      | 1                      |
|                          | 51–55                    | 59 027    | 312                 | 0.81 (0.69, 0.95)      | 0.83 (0.7, 0.97)       | 0.84 (0.71, 0.98)      | 0.84 (0.71, 0.98)      |
|                          | >55                      | 13 722    | 85                  | 0.73 (0.57, 0.93)      | 0.74 (0.58, 0.95)      | 0.74 (0.58, 0.95)      | 0.74 (0.58, 0.95)      |
| Vascular dementia (VD)   | ≤40                      | 2427      | 12                  | 1.98 (1.09, 3.58)      | 1.83 (1.01, 3.31)      | 1.61 (0.89, 2.92)      | 1.59 (0.88, 2.88)      |
|                          | 41–45                    | 16 279    | 62                  | 1.34 (0.99, 1.83)      | 1.31 (0.96, 1.78)      | 1.26 (0.93, 1.72)      | 1.25 (0.92, 1.71)      |
|                          | 46–50                    | 47 087    | 121                 | 1                      | 1                      | 1                      | 1                      |
|                          | 51–55                    | 59 027    | 120                 | 0.76 (0.59, 0.98)      | 0.79 (0.61, 1.01)      | 0.80 (0.62, 1.03)      | 0.80 (0.62, 1.03)      |
|                          | >55                      | 13 722    | 37                  | 0.75 (0.52, 1.08)      | 0.77 (0.53, 1.12)      | 0.78 (0.54, 1.13)      | 0.78 (0.54, 1.12)      |

Model 1: adjusted for age at baseline, race, BMI, education level, income level; Model 2: Model 1 plus leisure activities, cigarette smoking, alcohol drinking; Model 3: Model 2 plus CVD (Cardiovascular disease) and APOE (apolipoprotein E); Model 4: Model 3 plus ever-used menopausal hormone therapy (MHT) at baseline. HR, hazard ratio; CI, confidence interval.
