# Supplementary material for: Age at menopause and all-cause and cause-specific dementia: a prospective analysis of the UK Biobank cohort
Source: PubMed Central journal article supplement (PMC10663050; doi:10.1093/humrep/dead130), 2023-06-21
Supplement: dead130_supplementary_table_s8.pdf [file dead130_supplementary_table_s8.pdf]

**Supplementary Table S8.** Associations between age at natural menopause and all-cause dementia, Alzheimer’s disease (AD) and vascular dementia (VD) in women without using MHT.

| Dementia                    | Years | Women  | Dementia | Incidence rate<br>(per 10 000<br>person-years) | Model 1<br>HR (95% CI) | Model 2<br>HR (95% CI) | Model 3<br>HR (95% CI) |
|-----------------------------|-------|--------|----------|------------------------------------------------|------------------------|------------------------|------------------------|
| All-cause de-<br>mentia     | ≤40   | 802    | 15       | 14.9                                           | 1.21 (0.71, 2.06)      | 1.15 (0.67, 1.97)      | 0.98 (0.57, 1.68)      |
|                             | 41–45 | 7899   | 145      | 15.1                                           | 1.44 (1.18, 1.76)      | 1.42 (1.16, 1.73)      | 1.38 (1.13, 1.69)      |
|                             | 46–50 | 28 276 | 317      | 9.0                                            | 1                      | 1                      | 1                      |
|                             | 51–55 | 36 454 | 327      | 7.2                                            | 0.78 (0.67, 0.92)      | 0.80 (0.68, 0.94)      | 0.81 (0.69, 0.95)      |
|                             | >55   | 7413   | 88       | 9.6                                            | 0.75 (0.59, 0.95)      | 0.77 (0.60, 0.98)      | 0.77 (0.61, 0.98)      |
| Alzheimer’s<br>disease (AD) | ≤40   | 802    | 9        | 9.6                                            | 1.62 (0.82, 3.18)      | 1.55 (0.79, 3.04)      | 1.37 (0.69, 2.69)      |
|                             | 41–45 | 7899   | 63       | 6.6                                            | 1.30 (0.97, 1.75)      | 1.29 (0.96, 1.73)      | 1.26 (0.94, 1.70)      |
|                             | 46–50 | 28 276 | 151      | 4.3                                            | 1                      | 1                      | 1                      |
|                             | 51–55 | 36 454 | 158      | 3.5                                            | 0.80 (0.64, 1.00)      | 0.81 (0.65, 1.01)      | 0.82 (0.65, 1.03)      |
|                             | >55   | 7413   | 38       | 4.1                                            | 0.68 (0.47, 0.97)      | 0.69 (0.48, 0.99)      | 0.69 (0.48, 0.99)      |
| Vascular de-<br>mentia (VD) | ≤40   | 802    | 5        | 5.3                                            | 2.17 (0.87, 5.41)      | 2.04 (0.82, 5.11)      | 1.64 (0.65, 4.12)      |
|                             | 41–45 | 7899   | 24       | 2.5                                            | 1.25 (0.78, 2.01)      | 1.22 (0.76, 1.97)      | 1.18 (0.73, 1.90)      |
|                             | 46–50 | 28 276 | 58       | 1.7                                            | 1                      | 1                      | 1                      |
|                             | 51–55 | 36 454 | 59       | 1.3                                            | 0.77 (0.53, 1.10)      | 0.79 (0.55, 1.13)      | 0.79 (0.55, 1.14)      |
|                             | >55   | 7413   | 16       | 1.8                                            | 0.70 (0.4, 1.22)       | 0.72 (0.41, 1.26)      | 0.73 (0.42, 1.28)      |

Model 1: adjusted for age at baseline, race, BMI, education level, income level; Model 2: Model 1 plus leisure activities, cigarette smoking, alcohol drinking; Model 3: Model 2 plus CVD (cardiovascular disease) and APOE (apolipoprotein E). HR, hazard ratio; CI, confidence interval.
